# Supplementary material
Source: HighWire-hosted journal article supplement (https://jnm.snmjournals.org/highwire/filestream/95015/field_highwire_adjunct_files/0/173443_Supplemental_Data.pdf)
Supplement: 173443_Supplemental_Data.pdf [file 173443_Supplemental_Data.pdf]

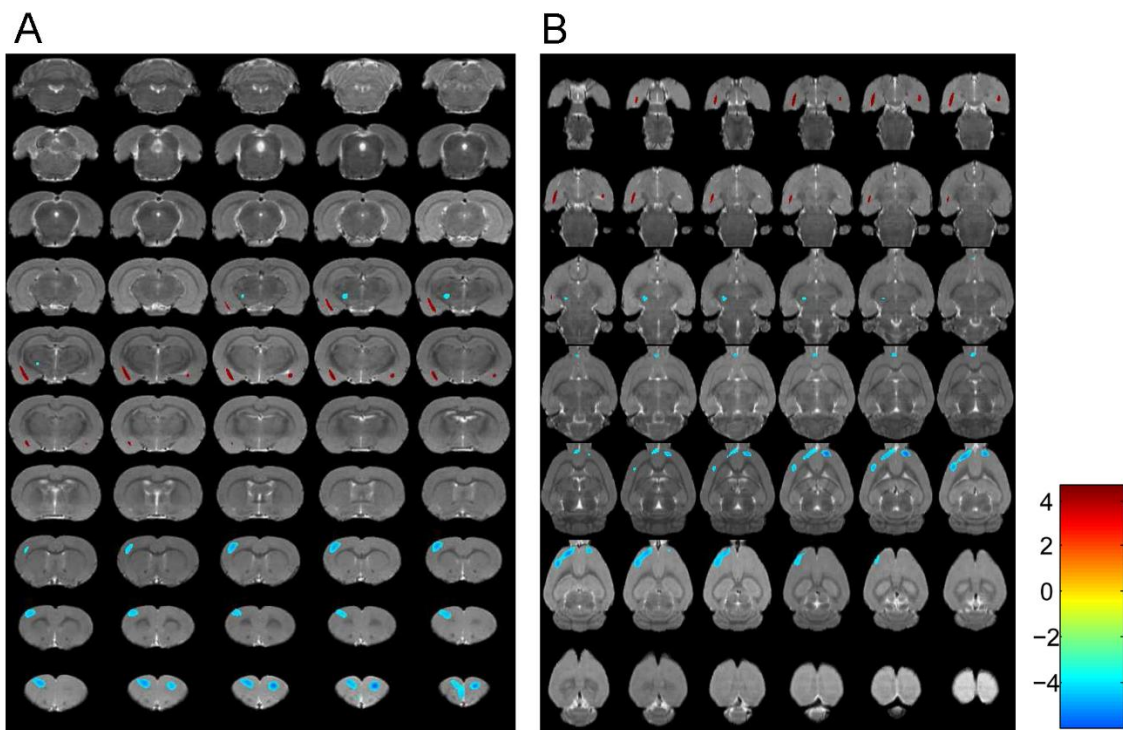

**SUPPLEMENTAL FIGURE 1.** Coronal (A) and transverse (B) PET images demonstrated significant changes of glucose metabolism under fear conditioning ( $n = 8$ ,  $P < 0.001$ ). Differences for brain regions have been color coded and are superimposed on MRI template.

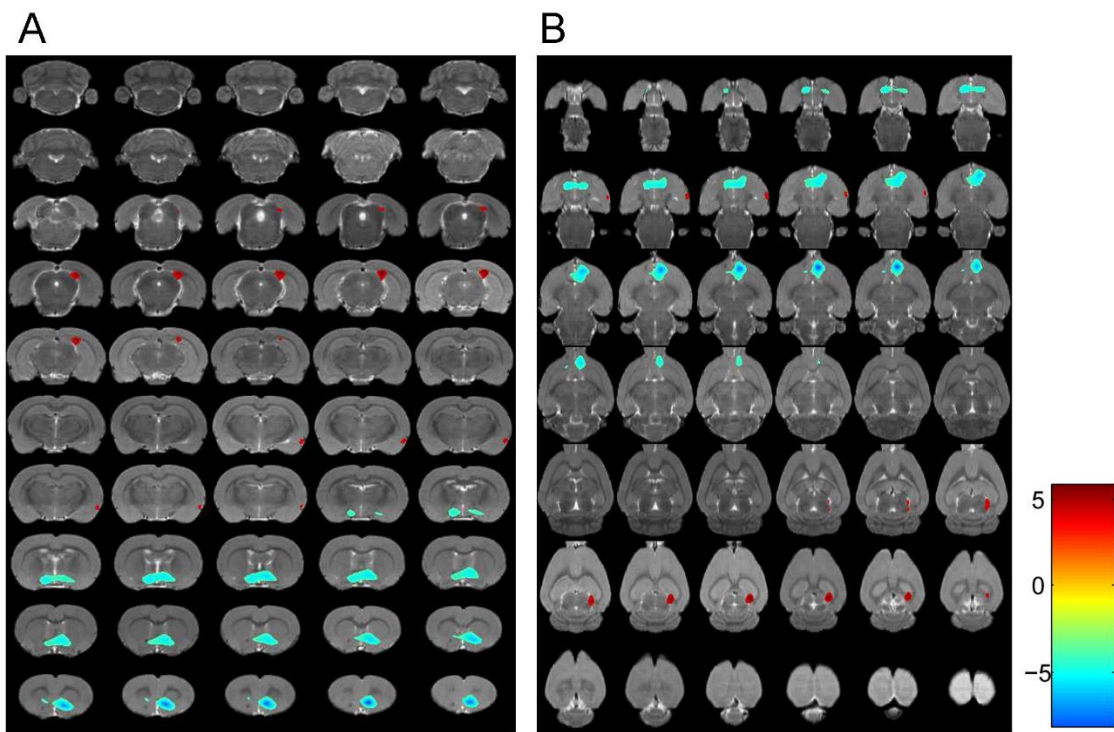

**SUPPLEMENTAL FIGURE 2.** Coronal (A) and transverse (B) PET images demonstrated significant changes of glucose metabolism under extinction retrieval ( $n = 8$ ,  $P < 0.001$ ). Differences for brain regions have been color coded and are superimposed on MRI template.
